# Supplementary material for: Fast-Response Non-Contact Flexible Humidity Sensor Based on Direct-Writing Printing for Respiration Monitoring
Source: MDPI journal article supplement (doi:10.3390/bios13080792), 2023-08-07
Supplement: s1 [file s1]

# Fast-Response Non-Contact Flexible Humidity Sensor Based on Direct-Writing Printing for Respiration Monitoring

Xiaojun Chen <sup>1,\*</sup>, Kanglin Ma <sup>1</sup>, Jialin Ou <sup>1</sup>, Deyun Mo <sup>1</sup>, Haishan Lian <sup>1</sup>, Xin Li <sup>1</sup>, Zaifu Cui <sup>1</sup> and Yihui Luo <sup>2</sup>

<sup>1</sup> School of Mechanical and Electronic Engineering, Lingnan Normal University, Zhanjiang 524048, China; mkl447314@163.com (K.M.); 18875943150@163.com (J.O.); dewin\_mo@163.com (D.M.);

lianhs@lingnan.edu.cn (H.L.); 19820180155649@stu.xmu.edu.cn (X.L.); zaifucui@lingnan.edu.cn (Z.C.)

<sup>2</sup> Department of Mechanical & Electrical Engineering, Xiamen University, Xiamen 361102, China; 19920161151457@stu.xmu.edu.cn (Y.L.)

\* Correspondence: [chxj@lingnan.edu.cn](mailto:chxj@lingnan.edu.cn) (X.C.); Tel.: +86-180-3025-0016

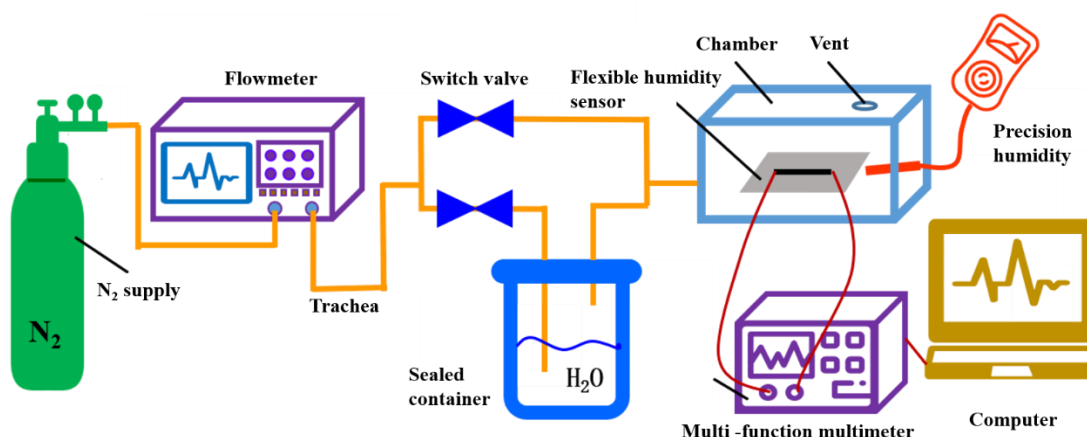

Figure S1. Humidity detection system.

Table S1. Summary of the characteristics of different humidity sensors.

| Sensing type  | Sensing material                  | substrate              | Response/re-cover | sensitivity  | Range of humidity |
|---------------|-----------------------------------|------------------------|-------------------|--------------|-------------------|
| Resistive [1] | Silver nanowires                  | Polyimide              | 5 s/14 s          | 0.01 MΩ/%RH  | 11-95 %RH         |
| Capacitive[2] | Graphene                          | Polyamide              | 1 s/1 s           | 57.36 pF/%RH | 11-95 %RH         |
| Resistive[3]  | α-Fe2O3                           | Polyamide/polyurethane | 4 s/8 s           | 1.16 MΩ/%RH  | 10-98 %RH         |
| Capacitive[4] | GO/PEDOT:PSS                      | Polystyrene            | 1 s/5 s           | 0.076 pF/%RH | 5-95 %RH          |
| Resistive[5]  | Cellulose nano-fiber/carbon black | Ag                     | 10 s/6 s          | 43.2 pF/%RH  | 30-90 %RH         |
| Resistive[6]  | Silk fibroin/silver               | PET                    | 73.1 s/11.3 s     | 0.2 nA/%RH   | N/A               |
| This work     | GNPS/MWCNT                        | PDMS                   | 0.35 s/2.5 s      | 1.4 RH-1     | 20-90%RH          |

## Reference

- [1] Yang, Y., Chen, Z., Lu, N., Xu, Q., Chen, G., Zhou, Y., Lu, J., Gu, C. & Fan, Z. (2019). A flexible humidity sensor based on silver nanowires and polyimide. *Materials Research Express*, 7(2), 025609.
- [2] Khot, L.R., Nemade, K.R. & Ghotekar, S.K. (2020). Graphene-based room temperature humidity sensor for biomedical

applications. *Journal of Materials Science: Materials in Electronics*, 31(19), 16803-16810.

- [3] Chakraborty, S., Pal, S. & Banerjee, D. (2021). Dandelion-like  $\alpha$ -Fe<sub>2</sub>O<sub>3</sub> microsphere coated thermoresponsive core-sheath electrospun nanofiber for high-performance humidity sensor. *Sensors and Actuators B: Chemical*, 334, 129688.
- [4] Hossain, M.M., Kim, S., Kim, J.H. & Lee, J.J. (2020). Self-Powered Triboelectric Nanogenerator-Based Humidity Sensor Fabricated Using Layer-by-Layer Assembly of GO and PEDOT:PSS. *Sensors and Actuators Physical*, 303, 111856.
- [5] Wang Y F , Tachibana S , Sekine T . A Printed Flexible Humidity Sensor with High Sensitivity and Fast Response Using a Cellulose Nanofiber/Carbon Black Composite[J]. *ACS applied materials & interfaces*, 2022(4):14.
- [6] Zheng, Y. et al. A flexible humidity sensor based on natural biocompatible silk fibroin films. *Adv. Mater. Technol.* 6, 2001053 (2021).
